# Supplementary material for: Recommendations on service delivery to help reduce suffering and anxiety in patients and caregivers post-hematopoietic cell transplantation: a case report
Source: Springer Nature journal article supplement (doi:10.1186/s13256-021-03126-4), 2021-11-05

**JOINTS AND FASCIA**

No symptoms

Mild tightness of arms or legs, normal or mild decreased range of motion (ROM) AND not affecting ADL

Tightness of arms or legs OR joint contractures, erythema thought due to fasciitis, moderate decrease ROM AND mild to moderate limitation of ADL

Contractures WITH significant decrease of ROM AND significant limitation of ADL (unable to tie shoes, button shirts, dress self etc.)

**P-ROM score**

(see below)

Shoulder (1-7) 2

Elbow (1-7) 4

Wrist/finger (1-7) 2

Ankle (1-4) 2

Abnormality present but explained entirely by non-GVHD documented cause (specify): \_\_\_\_\_

Abnormality thought to represent GVHD PLUS other causes (specify): \_\_\_\_\_

**GENITAL TRACT**

(See Supplemental figure!)

No signs

Mild signs<sup>‡</sup> and females with or without discomfort on exam

Moderate signs<sup>‡</sup> and may have symptoms with discomfort on exam

Severe signs<sup>‡</sup> with or without symptoms

Not examined

Currently sexually active

Yes

No

Abnormality present but explained entirely by non-GVHD documented cause (specify): \_\_\_\_\_

Abnormality thought to represent GVHD PLUS other causes (specify): \_\_\_\_\_

**Other indicators, clinical features or complications related to chronic GVHD (check all that apply and assign a score to severity (0-3) based on functional impact where applicable none = 0, mild = 1, moderate = 2, severe = 3)**

Ascites (serositis) \_\_\_\_\_

Myasthenia Gravis \_\_\_\_\_

Pericardial Effusion \_\_\_\_\_

Peripheral Neuropathy \_\_\_\_\_

Eosinophilia > 500/ $\mu$ l \_\_\_\_\_

Pleural Effusion(s) AA 2

Polymyositis \_\_\_\_\_

Platelets < 100,000/ $\mu$ l \_\_\_\_\_

Nephrotic syndrome \_\_\_\_\_

Weight loss >5%\* without GI symptoms

Others (specify): \_\_\_\_\_

Biopsy obtained:  Yes  No

Organ biopsied: \_\_\_\_\_ GVHD confirmed by histology:  Yes  No

**Overall GVHD Severity**

(Opinion of the evaluator)

No GVHD

Mild

Moderate

Severe

Change from prior evaluations:

No prior or current GVHD

Improved

Stable

Worse

N/A (baseline)

**Photographic Range of Motion (P-ROM):**

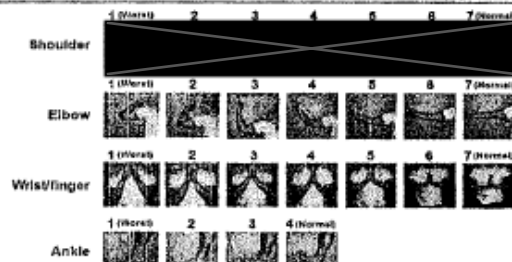

Supplement: MOESM2 [file 19832936]
