# Supplementary material for: Recommendations on service delivery to help reduce suffering and anxiety in patients and caregivers post-hematopoietic cell transplantation: a case report
Source: Springer Nature journal article supplement (doi:10.1186/s13256-021-03126-4), 2021-11-05
Supplement: MOESM3 [file 19832936]

**SCLERODERMA SKIN ASSESSMENT  
(Modified Rodnan Skin Score)**

Calculate a Modified Rodnan Skin Score by summing the scores from all evaluated anatomic areas.

A. Evaluate skin thickness by clinical palpation:

- 0 = normal skin thickness
- 1 = mild skin thickness
- 2 = moderate skin thickness
- 3 = severe skin thickness (inability to pinch skin into a fold)

B. Surface of anatomic areas evaluated (N = 17)

|                  |   | Dates: | 2/6/19 |       |       |       |       |
|------------------|---|--------|--------|-------|-------|-------|-------|
| Area of Body     |   | Range  | Score  | Score | Score | Score | Score |
| Face             |   | 0-3    | 1      |       |       |       |       |
| Anterior Chest   |   | 0-3    | 3      |       |       |       |       |
| Abdomen          |   | 0-3    | 2      |       |       |       |       |
| Fingers          | R | 0-3    | 2      |       |       |       |       |
|                  | L | 0-3    | 2      |       |       |       |       |
| Dorsium of Hands | R | 0-3    | 2      |       |       |       |       |
|                  | L | 0-3    | 2      |       |       |       |       |
| Forearms         | R | 0-3    | 3      |       |       |       |       |
|                  | L | 0-3    | 3      |       |       |       |       |
| Upper arms       | R | 0-3    | 3      |       |       |       |       |
|                  | L | 0-3    | 3      |       |       |       |       |
| Thighs           | R | 0-3    | 2      |       |       |       |       |
|                  | L | 0-3    | 2      |       |       |       |       |
| Lower legs       | R | 0-3    | 2      |       |       |       |       |
|                  | L | 0-3    | 2      |       |       |       |       |
| Dorsium of Feet  | R | 0-3    | 1      |       |       |       |       |
|                  | L | 0-3    | 1      |       |       |       |       |
| <b>TOTAL</b>     |   | 0-51   | 36     |       |       |       |       |
